# Supplementary material for: Multifactorial Competition and Resistance in a Two-Species Bacterial System
Source: PubMed Central journal article supplement (PMC4672897; doi:10.1371/journal.pgen.1005715), 2015-12-08
Supplement: pgen.1005715.s006.pdf [file pgen.1005715.s006.pdf]

**S1 Table.** Mutations identified in the evolved strains compared to the parental MG1655.

| Selective Agent   | Population | Strain  | Position         | Mutation         | Annotation                        | Gene                             |                                  |                  |
|-------------------|------------|---------|------------------|------------------|-----------------------------------|----------------------------------|----------------------------------|------------------|
| WT spent media    | WT2        | WT2_2   | 611,871          | G→T              | intergenic (-154/-167)            | <i>fepA / fes</i>                |                                  |                  |
|                   |            |         | 903,861          | G→T              | E16* ( <u>G</u> AA→ <u>I</u> AA)  | <i>ybjQ</i>                      |                                  |                  |
|                   |            |         | 1,195,443        | C→T              | H366H ( <u>C</u> AC→ <u>C</u> AT) | <i>icd</i>                       |                                  |                  |
|                   |            |         | 1,195,455        | C→T              | T370T ( <u>A</u> CC→ <u>A</u> CI) | <i>icd</i>                       |                                  |                  |
|                   |            |         | 1,195,468        | T→C              | L375L ( <u>I</u> TA→ <u>C</u> TA) | <i>icd</i>                       |                                  |                  |
|                   |            |         | 1,195,470        | A→G              | L375L (TT <u>A</u> →TT <u>G</u> ) | <i>icd</i>                       |                                  |                  |
|                   |            |         | 1,982,212        | C→G              | G294G (GG <u>G</u> →GG <u>C</u> ) | <i>araG</i>                      |                                  |                  |
|                   |            |         | 2,808,978        | A→C              | T63P ( <u>A</u> CG→ <u>C</u> CG)  | <i>mprA</i>                      |                                  |                  |
|                   |            |         | 4,275,901        | A→G              | D137G ( <u>G</u> AC→ <u>G</u> GC) | <i>soxR</i>                      |                                  |                  |
|                   |            | WT2_3   | 611871           | G→T              | intergenic (-154/-167)            | <i>fepA / fes</i>                |                                  |                  |
|                   |            |         | 2808978          | A→C              | T63P (ACG→CCG)                    | <i>mprA</i>                      |                                  |                  |
|                   |            |         | 3578318          | Δ3,133 bp        | IS1-mediated                      | <i>[yhhX]-yrhA</i>               |                                  |                  |
|                   |            |         | 4294404          | +GC              | intergenic (+587/+55)             | <i>gltP / yjcO</i>               |                                  |                  |
|                   | WT3        | WT3_2   | 1,208,643        | C→G              | pseudogene (200/501 nt)           | <i>stfE</i>                      |                                  |                  |
|                   |            |         |                  | 2,150,268        | C→G                               | E77Q ( <u>G</u> AA→ <u>C</u> AA) | <i>yegK</i>                      |                  |
|                   |            |         |                  | 2,809,057        | C→T                               | T89M ( <u>A</u> CG→ <u>A</u> IG) | <i>mprA</i>                      |                  |
|                   |            |         |                  | 3,577,701        | Δ3,750 bp                         | IS 1-mediated                    | <i>yhhX-yrhA</i>                 |                  |
|                   |            |         |                  | WT3_3            | 2,809,057                         | C→T                              | T89M ( <u>A</u> CG→ <u>A</u> IG) | <i>mprA</i>      |
|                   |            |         |                  |                  | 3,577,701                         | Δ3,750 bp                        | IS 1-mediated                    | <i>yhhX-yrhA</i> |
| ΔpvdJ spent media | pvdJ1      | pvdJ1_2 | <b>2,809,237</b> | <b>Δ1 bp</b>     | <b>coding (446/531 nt)</b>        | <b><i>mprA</i></b>               |                                  |                  |
|                   |            |         |                  |                  |                                   |                                  |                                  |                  |
|                   |            |         | pvdJ1_3          | <b>2,809,237</b> | <b>Δ1 bp</b>                      | <b>coding (446/531 nt)</b>       | <b><i>mprA</i></b>               |                  |
|                   |            |         |                  |                  |                                   |                                  |                                  |                  |
|                   | pvdJ2      | pvdJ2_1 |                  | 1,208,643        | C→G                               | pseudogene (200/501 nt)          | <i>stfE</i>                      |                  |
|                   |            |         |                  | <b>2,809,237</b> | <b>Δ1 bp</b>                      | <b>coding (446/531 nt)</b>       | <b><i>mprA</i></b>               |                  |
|                   |            |         |                  | 4,294,404        | +GC                               | intergenic (+587/+55)            | <i>gltP / yjcO</i>               |                  |
|                   |            |         |                  |                  |                                   |                                  |                                  |                  |
|                   |            | pvdJ2   | <b>2,809,237</b> | <b>Δ1 bp</b>     | <b>coding (446/531 nt)</b>        | <b><i>mprA</i></b>               |                                  |                  |

|           |       |         |                  |                |                                     |             |
|-----------|-------|---------|------------------|----------------|-------------------------------------|-------------|
|           |       | _2      |                  |                |                                     |             |
|           |       |         | 3,577,292        | Δ4,159 bp      | IS 1-mediated                       | [yhhW]–yrhA |
|           |       |         | 4,294,404        | +GC            | intergenic (+587/+55)               | gltP / yjcO |
|           |       |         |                  |                |                                     |             |
|           |       | pvdJ2_3 | 1,040,609        | G→C            | G257A (G <u>G</u> A→G <u>C</u> A)   | appA        |
|           |       |         | <b>2,809,237</b> | <b>Δ1 bp</b>   | <b>coding (446/531 nt)</b>          | <b>mprA</b> |
|           |       |         | 3,578,830        | Δ2,622 bp      | IS 1-mediated                       | yhhY–yrhA   |
|           |       |         |                  |                |                                     |             |
|           | pvdJ3 | pvdJ3_1 | 485,346          | IS 1 (–) +8 bp | coding (362-369/648 nt)             | acrR        |
|           |       |         | 2,809,117        | A→C            | D109A (G <u>A</u> T→G <u>C</u> T)   | mprA        |
|           |       |         |                  |                |                                     |             |
|           |       | pvdJ3_2 | 485,346          | IS 1 (–) +8 bp | coding (362-369/648 nt)             | acrR        |
|           |       |         | 1,525,626        | G→C            | intergenic (+450/-300)              | yncH / rhsE |
|           |       |         | 2,809,117        | A→C            | D109A (G <u>A</u> T→G <u>C</u> T)   | mprA        |
|           |       |         | 4,205,587        | A→C            | intergenic (-32/-583)               | purH / rrsE |
|           |       |         |                  |                |                                     |             |
|           |       | pvdJ3_3 | 2,809,117        | A→C            | D109A (G <u>A</u> T→G <u>C</u> T)   | mprA        |
|           |       |         | 3,583,704        | G→T            | G381G (GG <u>C</u> →GG <u>A</u> )   | ggt         |
|           |       |         | 3,726,206        | C→G            | A397P (G <u>C</u> G→ <u>C</u> CG)   | xylB        |
|           |       |         | 4,176,250        | T→G            | V162G (G <u>I</u> T→G <u>G</u> T)   | nusG        |
|           |       |         | 4,205,587        | A→C            | intergenic (-32/-583)               | purH / rrsE |
|           |       |         | 4,294,404        | +GC            | intergenic (+587/+55)               | gltP / yjcO |
|           |       |         |                  |                |                                     |             |
| pyocyanin | pyo1  | pyo1_1  | <b>2,310,612</b> | <b>G→A</b>     | <b>Q54* (C<u>A</u>G→<u>I</u>AG)</b> | <b>ompC</b> |
|           |       |         | <b>4,112,442</b> | <b>G→A</b>     | <b>A18A (GC<u>C</u>→GC<u>I</u>)</b> | <b>fpr</b>  |
|           |       |         | 4,112,479        | G→A            | T6I (A <u>C</u> A→A <u>I</u> A)     | fpr         |
|           |       |         |                  |                |                                     |             |
|           |       | pyo1_2  | 1,040,609        | G→C            | G257A (G <u>G</u> A→G <u>C</u> A)   | appA        |
|           |       |         | 1,754,820        | G→T            | E367* (G <u>A</u> A→ <u>I</u> AA)   | pykF        |
|           |       |         | 1,755,411        | C→G            | intergenic (+277/-34)               | pykF / lpp  |
|           |       |         | <b>2,310,612</b> | <b>G→A</b>     | <b>Q54* (C<u>A</u>G→<u>I</u>AG)</b> | <b>ompC</b> |
|           |       |         | 3,309,402        | IS4 (+) +12 bp | intergenic (-212/+24)               | pnp / rpsO  |
|           |       |         | <b>4,112,442</b> | <b>G→A</b>     | <b>A18A (GC<u>C</u>→GC<u>I</u>)</b> | <b>fpr</b>  |
|           |       |         |                  |                |                                     |             |
|           |       | pyo1_3  | 1,754,820        | G→T            | E367* (G <u>A</u> A→ <u>I</u> AA)   | pykF        |
|           |       |         | 1,755,411        | C→G            | intergenic (+277/-34)               | pykF / lpp  |

|  |      |            |           |     |                                   |                    |
|--|------|------------|-----------|-----|-----------------------------------|--------------------|
|  |      |            | 2,310,612 | G→A | Q54* ( <b>C</b> AG→ <b>I</b> AG)  | <i>ompC</i>        |
|  |      |            | 4,112,442 | G→A | A18A ( <b>G</b> CC→ <b>G</b> CI)  | <i>fpr</i>         |
|  | pyo2 | pyo2_<br>1 | 729,877   | T→C | C358R ( <b>I</b> GT→ <b>C</b> GT) | <i>rhcC</i>        |
|  |      |            | 2,310,234 | +TC | coding (538/1104 nt)              | <i>ompC</i>        |
|  |      |            | 4,112,492 | C→A | A2S ( <b>G</b> CT→ <b>I</b> CT)   | <i>fpr</i>         |
|  |      | pyo2_<br>2 | 1,525,626 | G→C | intergenic (+450/-300)            | <i>yncH / rhsE</i> |
|  |      |            | 2,310,234 | +TC | coding (538/1104 nt)              | <i>ompC</i>        |
|  |      |            | 4,112,492 | C→A | A2S ( <b>G</b> CT→ <b>I</b> CT)   | <i>fpr</i>         |
|  |      | pyo2_<br>3 | 729,877   | T→C | C358R ( <b>I</b> GT→ <b>C</b> GT) | <i>rhcC</i>        |
|  |      |            | 2,310,234 | +TC | coding (538/1104 nt)              | <i>ompC</i>        |
|  |      |            | 4,112,492 | C→A | A2S ( <b>G</b> CT→ <b>I</b> CT)   | <i>fpr</i>         |
|  |      |            | 4,294,403 | +G  | intergenic (+586/+56)             | <i>gltP / yjcO</i> |

The mutations in **bold** were transferred to the parental WT strain and tested further.
