# Supplementary material for: Multifactorial Competition and Resistance in a Two-Species Bacterial System
Source: PubMed Central journal article supplement (PMC4672897; doi:10.1371/journal.pgen.1005715), 2015-12-08
Supplement: pgen.1005715.s007.pdf [file pgen.1005715.s007.pdf]

**S2 Table.** Bacterial Strains used in this study.

| <b>Species</b>       | <b>Genotype</b>                                           | <b>Source</b> |
|----------------------|-----------------------------------------------------------|---------------|
| <i>E. coli</i>       | MG1655                                                    | ATCC 47076    |
|                      | <i>fpr1</i> *                                             | This study    |
|                      | <i>fpr2</i> *                                             | This study    |
|                      | <i>mprA</i> *                                             | This study    |
|                      | <i>ompC</i> *                                             | This study    |
|                      | <i>ompC</i> * <i>fpr2</i> *                               | This study    |
|                      | $\Delta fpr$                                              | This study    |
|                      | $\Delta mprA$                                             | This study    |
|                      | $\Delta ompC$                                             | This study    |
| <i>P. aeruginosa</i> | PA14                                                      | [1]           |
|                      | $\Delta pvdJ$                                             | This study    |
|                      | $\Delta pchE$                                             | This study    |
|                      | $\Delta pqsA$                                             | This study    |
|                      | $\Delta pqsE$                                             | This study    |
|                      | $\Delta phzA1-G1 \Delta phzA2-G2$                         | This study    |
|                      | $\Delta pvdJ \Delta pchE$                                 | This study    |
|                      | $\Delta pvdJ \Delta pchE \Delta pqsA$                     | This study    |
|                      | $\Delta pvdJ \Delta pchE \Delta pqsE$                     | This study    |
|                      | $\Delta pvdJ \Delta pchE \Delta phzA1-G1 \Delta phzA2-G2$ | This study    |

1. Rahme LG, Stevens EJ, Wolfort SF, Shao J, Tompkins RG, Ausubel FM. Common virulence factors for bacterial pathogenicity in plants and animals. *Science*. 1995;268(5219):1899-902. doi: 10.1126/science.7604262.
