# Supplementary material for: Multifactorial Competition and Resistance in a Two-Species Bacterial System
Source: PubMed Central journal article supplement (PMC4672897; doi:10.1371/journal.pgen.1005715), 2015-12-08
Supplement: pgen.1005715.s008.pdf [file pgen.1005715.s008.pdf]

**S3 Table.** Antibiotic concentrations used during strain construction.

| <b>Antibiotic</b> | <b>Concentration</b> |
|-------------------|----------------------|
| Ampicillin        | 100 µg/ml            |
| Spectinomycin     | 100 µg/ml            |
| Carbenicillin     | 200 µg/ml            |
| Gentamycin        | 50 µg/ml             |
| Irgasan           | 25 µg/ml             |
| Chloramphenicol   | 30 µg/ml             |
