# Supplementary material for: Multifactorial Competition and Resistance in a Two-Species Bacterial System
Source: PubMed Central journal article supplement (PMC4672897; doi:10.1371/journal.pgen.1005715), 2015-12-08
Supplement: pgen.1005715.s009.pdf [file pgen.1005715.s009.pdf]

**S4 Table.** Sequences of primers used for the construction of the *P. aeruginosa* mutant strains.

| Primer Description                                            | Primer sequence <sup>a</sup>                                     |
|---------------------------------------------------------------|------------------------------------------------------------------|
| Forward primer for FRT-flanked gentamycin-resistance cassette | CGA ATT AGC TTC AAA AGC GCT CTG A                                |
| Reverse primer for FRT-flanked gentamycin-resistance cassette | CGA ATT GGG GAT CTT GAA GTT CCT                                  |
| Forward primer for upstream fragment of <i>pvdJ</i>           | GAG GCT TCC GCA TCG AAC TG                                       |
| Reverse primer for upstream fragment of <i>pvdJ</i>           | <b>TCAGAGCGCTTTTGAAGCTAATTG</b> CAG<br>GTT TGG ATT GGA AAG CAT G |
| Forward primer for downstream fragment of <i>pvdJ</i>         | <b>AGGAACTTCAAGATCCCCAATTG</b> GCG<br>CTC AAA CGT CTA TCT G      |
| Reverse primer for downstream fragment of <i>pvdJ</i>         | GCT CGA GCC CTC GAC TAT AG                                       |
| Forward primer for upstream fragment of <i>pchE</i>           | CAG CGC CCA GTT CCT TTC C                                        |
| Reverse primer for upstream fragment of <i>pchE</i>           | <b>TCAGAGCGCTTTTGAAGCTAATTG</b> AGG<br>GCG GTA CGG GAA TCG G     |
| Forward primer for downstream fragment of <i>pchE</i>         | <b>AGGAACTTCAAGATCCCCAATTG</b> ATC<br>GAG GAA ACC CAA CTG GAG    |
| Reverse primer for downstream fragment of <i>pchE</i>         | CCG GCC GAT ACT CAG CTC                                          |
| Forward primer for upstream fragment of <i>pqsA</i>           | GGC ATG TAG GTG TCC TCT TCG                                      |
| Reverse primer for upstream fragment of <i>pqsA</i>           | <b>TCAGAGCGCTTTTGAAGCTAATTG</b> GCG<br>GAA CAG AAC CTC GGT CAG   |
| Forward primer for downstream fragment of <i>pqsA</i>         | <b>AGGAACTTCAAGATCCCCAATTG</b> GAG<br>GAA CGG GCA TGT TGA TTC AG |
| Reverse primer for downstream fragment of <i>pqsA</i>         | CCG GCA GGT TGA GGT GTC C                                        |
| Forward primer for upstream fragment of <i>pqsE</i>           | GGC ATG TCC TGG TGG TCT GC                                       |
| Reverse primer for upstream fragment of <i>pqsE</i>           | <b>TCAGAGCGCTTTTGAAGCTAATTG</b> GGG<br>AGC CGA AAG CCT CAA C     |
| Forward primer for downstream fragment of <i>pqsE</i>         | <b>AGGAACTTCAAGATCCCCAATTG</b> CAG<br>GCG CTG CCT CTG GAC        |
| Reverse primer for downstream fragment of <i>pqsE</i>         | GCC AGG TCG AAA CTG AAC AGG                                      |

**a** The sequence in **bold** overlaps with the FRT-flanked gentamycin-resistance cassette, and is required for the overlap extension PCR.
