# Supplementary material for: Multifactorial Competition and Resistance in a Two-Species Bacterial System
Source: PubMed Central journal article supplement (PMC4672897; doi:10.1371/journal.pgen.1005715), 2015-12-08
Supplement: pgen.1005715.s010.pdf [file pgen.1005715.s010.pdf]

**S5 Table.** Mutations identified in the parental MG1655 strain compared to the reference sequence.

| Position  | Mutation | Annotation              | Gene                          |
|-----------|----------|-------------------------|-------------------------------|
| 263,322   | G→T      | L50L (CTC→CTA)          | <i>ykfH</i> ←                 |
| 547,694   | A→G      | pseudogene (114/252 nt) | <i>ylbE</i> →                 |
| 547,835   | +G       | pseudogene (4/1008 nt)  | <i>ylbE</i> →                 |
| 1,196,725 | C→T      | G11R (GGA→AGA)          | <i>yfmD</i> ←                 |
| 1,976,527 | Δ776 bp  |                         | <i>insB1-insA</i>             |
| 2,677,547 | G→T      | A1074D (GCT→GAT)        | <i>yphG</i> ←                 |
| 3,411,593 | T→C      | intergenic (-106/-293)  | <i>envR</i> ← / → <i>acrE</i> |
| 3,957,957 | C→T      | intergenic (-121/+78)   | <i>ppiC</i> ← / ← <i>yifN</i> |
