# Supplementary material for: Multifactorial Competition and Resistance in a Two-Species Bacterial System
Source: PubMed Central journal article supplement (PMC4672897; doi:10.1371/journal.pgen.1005715), 2015-12-08
Supplement: pgen.1005715.s011.pdf [file pgen.1005715.s011.pdf]

**S5 Table.** Sequences of primers used for the construction of the *E. coli* allele-replacement strains.

| <b>Primer Description</b>      | <b>Primer sequence<sup>a</sup></b>                           |
|--------------------------------|--------------------------------------------------------------|
| Forward primer for <i>fpr</i>  | <b>TCGGTACCCGGGGATCGC</b> AGC GAA GTT<br>GAC GTG CTG         |
| Reverse primer for <i>fpr</i>  | <b>CCGGTCGACTCTAGAG</b> CGG TAT CCG<br>TCC GGT GAG           |
| Forward primer for <i>mprA</i> | <b>TCGGTACCCGGGGATCGCGGCCGC</b> GCG<br>GTA GGT ATT TTG CTC   |
| Reverse primer for <i>mprA</i> | <b>CCGGTCGACTCTAGAGGATCC</b> TCT GTC<br>GGG TCG AGA GTG      |
| Forward primer for <i>ompC</i> | <b>TCGGTACCCGGGGATCGCGGCCGC</b> CGG<br>GAG TTA TTC TAG TTG C |
| Reverse primer for <i>ompC</i> | <b>CCGGTCGACTCTAGAGGATCC</b> TTG TCG<br>TCC AGC AGG TTG      |

**a** The sequence in **bold** overlaps with the pKOV plasmid, and is required for the Gibson Assembly.
